# Supplementary material for: N-Bromosuccinimide as an oxidant for the transition-metal-free synthesis of 2-aminobenzoxazoles from benzoxazoles and secondary amines
Source: Royal Society of Chemistry journal article supplement (doi:10.1039/c4ob00386a), 2014-01-01

## Supporting Information

### **N-Bromosuccinimide as Oxidant for the Transition-Metal-Free Synthesis of 2-Aminobenzoxazoles from Benzoxazoles and Secondary Amines**

Xiaoe Wang,<sup>a,b</sup> Daqian Xu,<sup>a</sup> Chengxia Miao,<sup>a</sup> Qiaohong Zhang,<sup>a</sup> Wei Sun<sup>\*a</sup>

<sup>a</sup> State Key Laboratory for Oxo Synthesis and Selective Oxidation, Lanzhou Institute of Chemical Physics, Chinese Academy of Sciences, Lanzhou, 730000, China

Fax: +86 931 827 7088

E-mail: wsun@licp.cas.cn

<sup>b</sup> University of Chinese Academy of Sciences, Beijing, 100049, P. R. China.

#### **1. Copies of <sup>1</sup>H and <sup>13</sup>C NMR spectra**

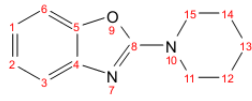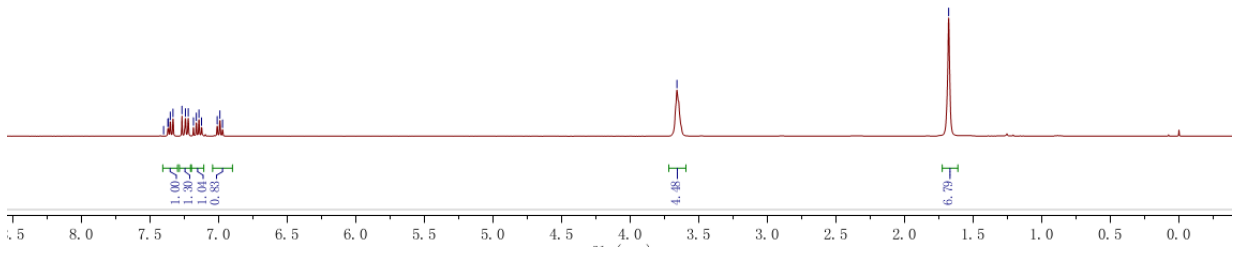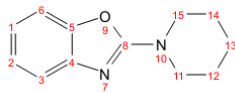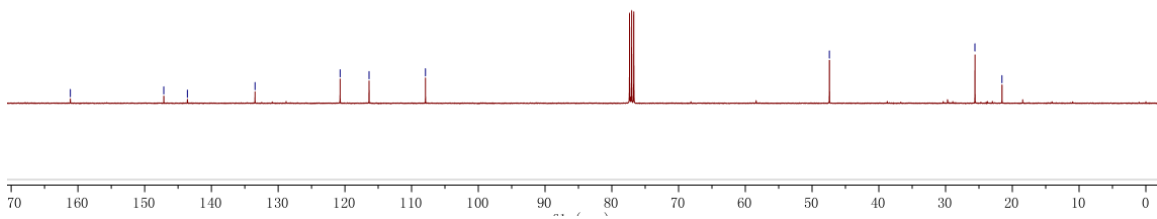

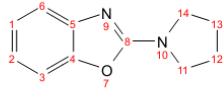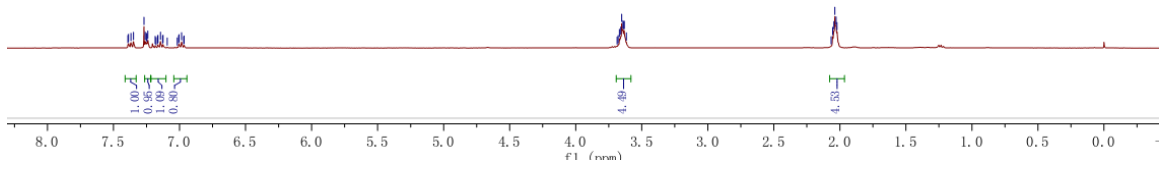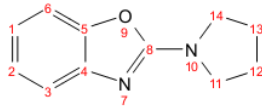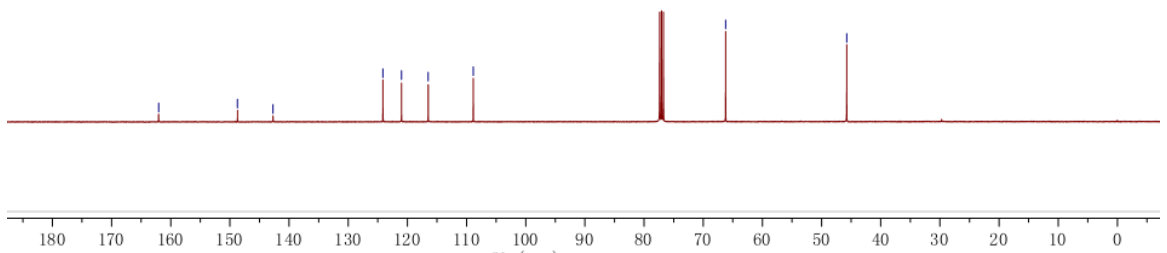

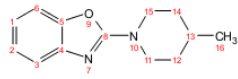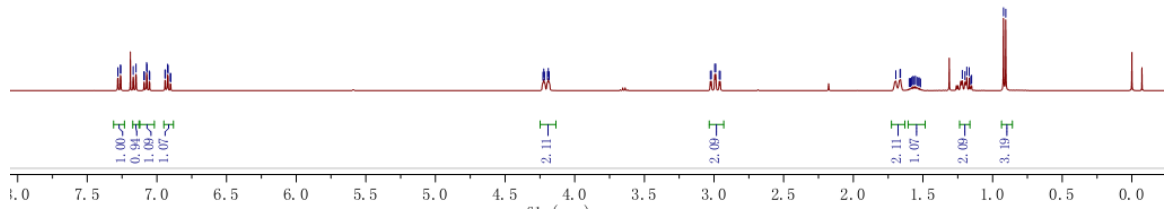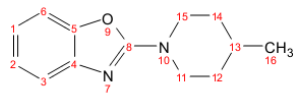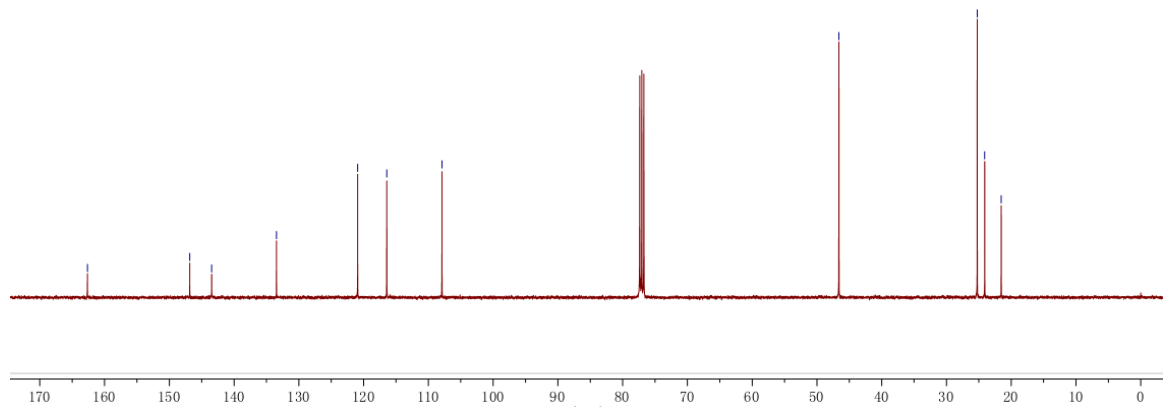

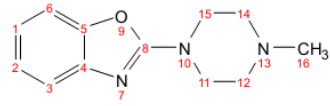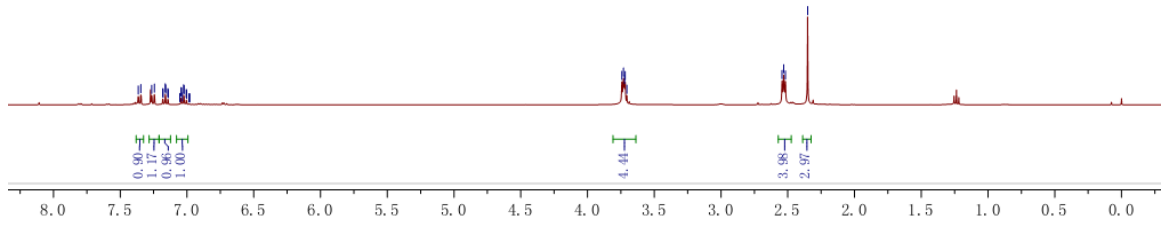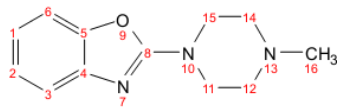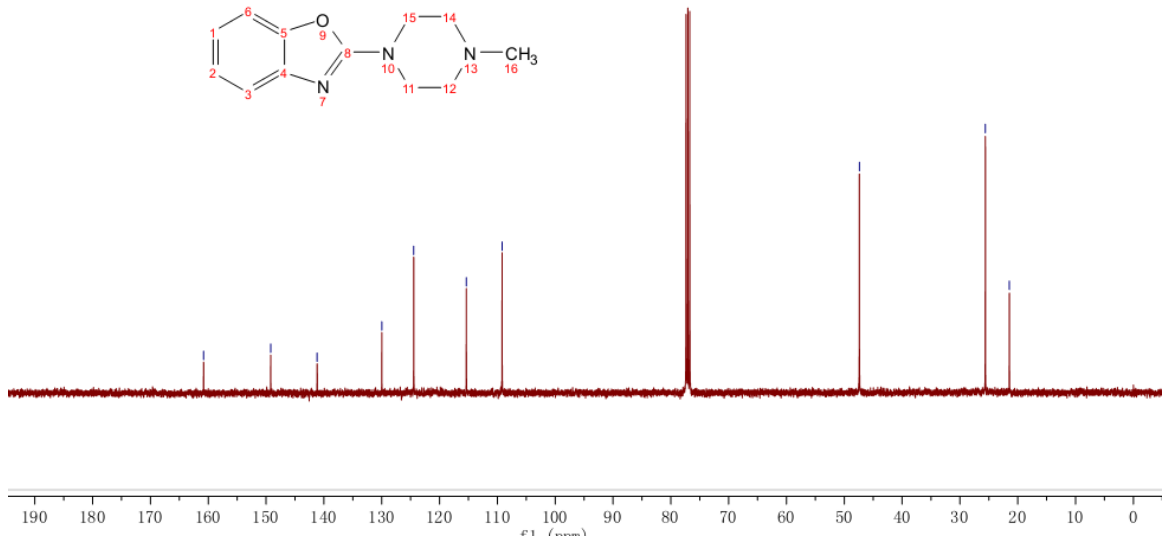

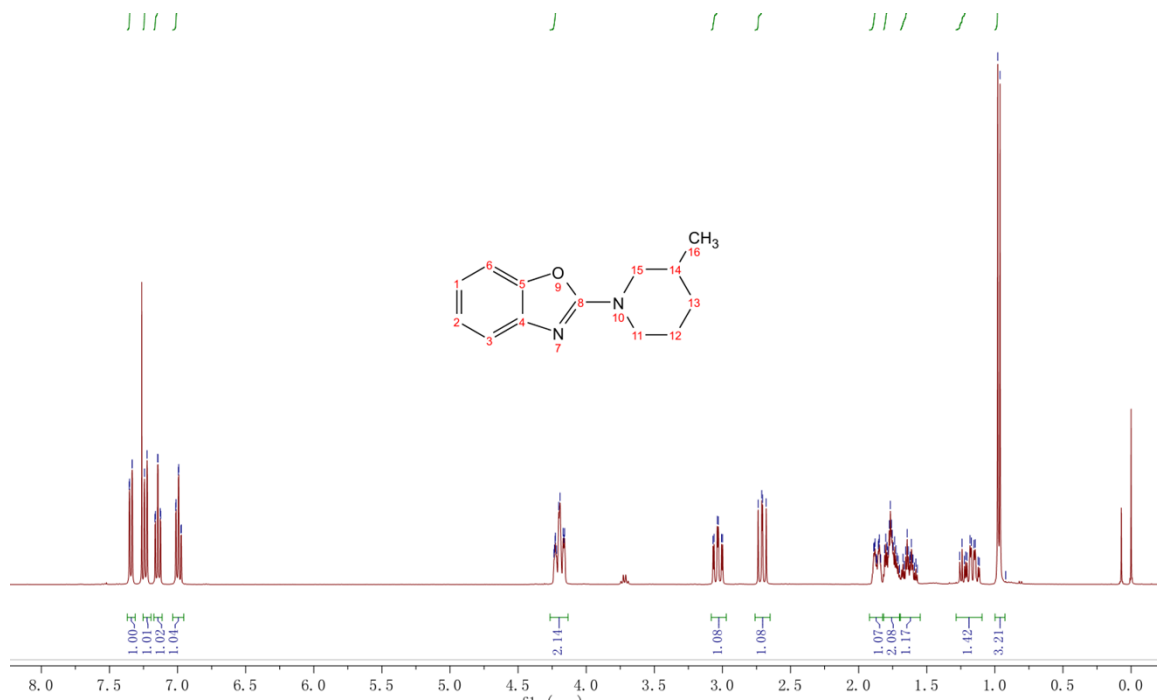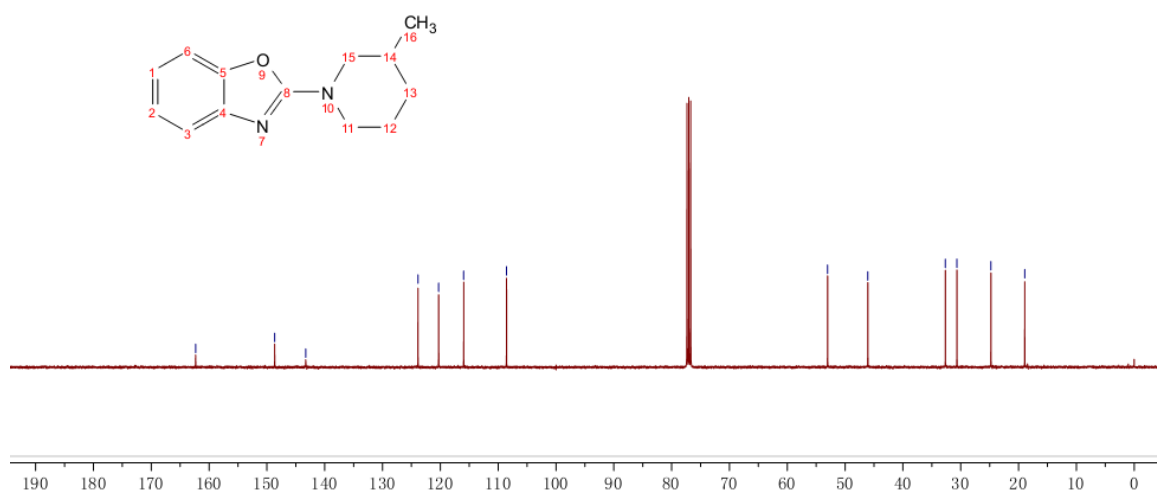

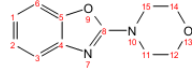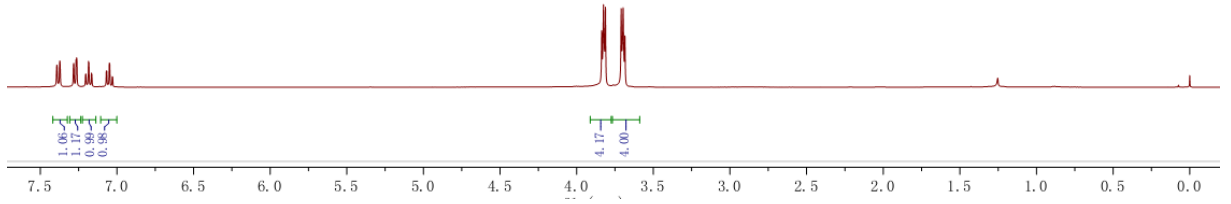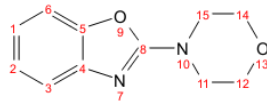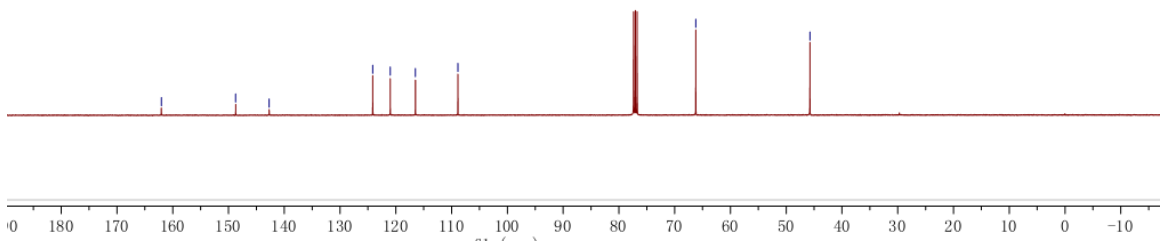

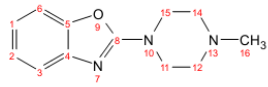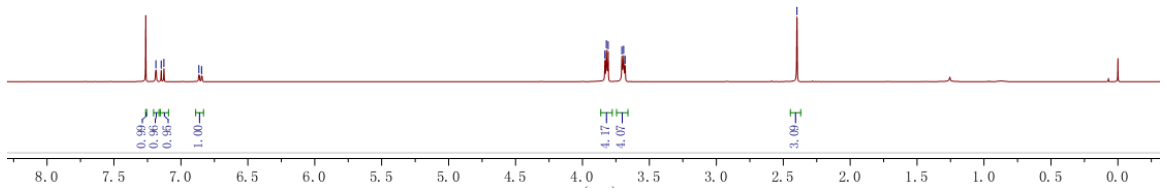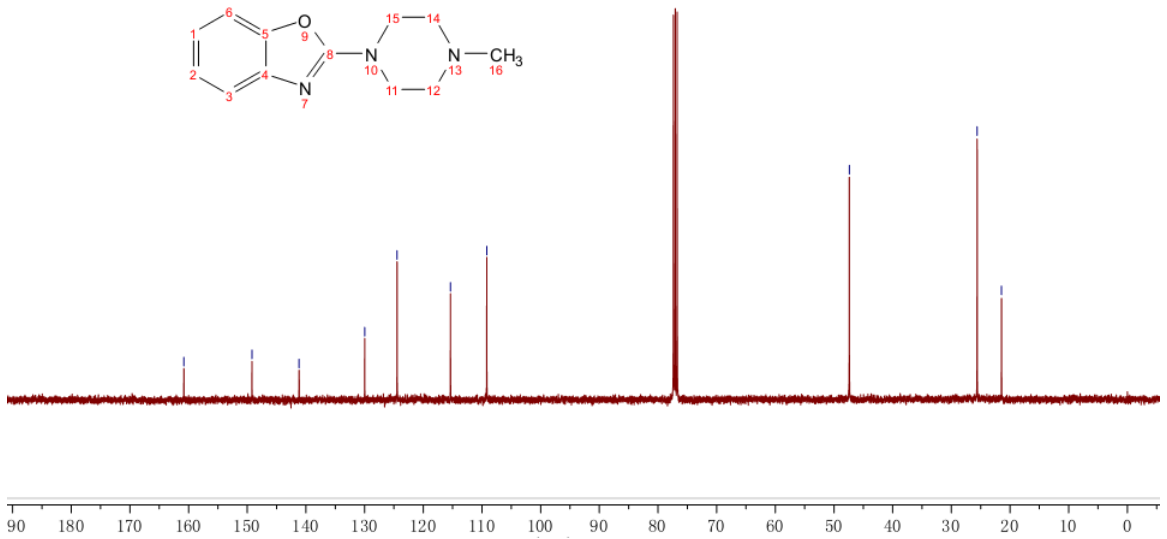



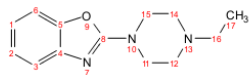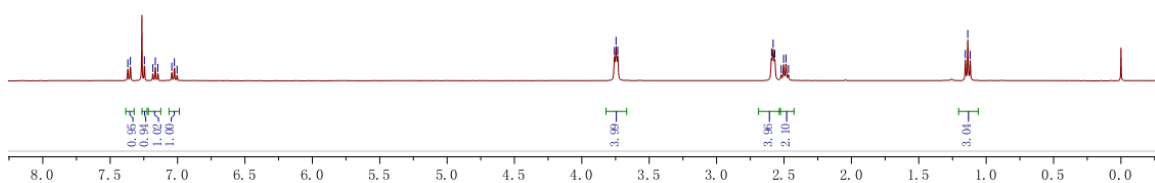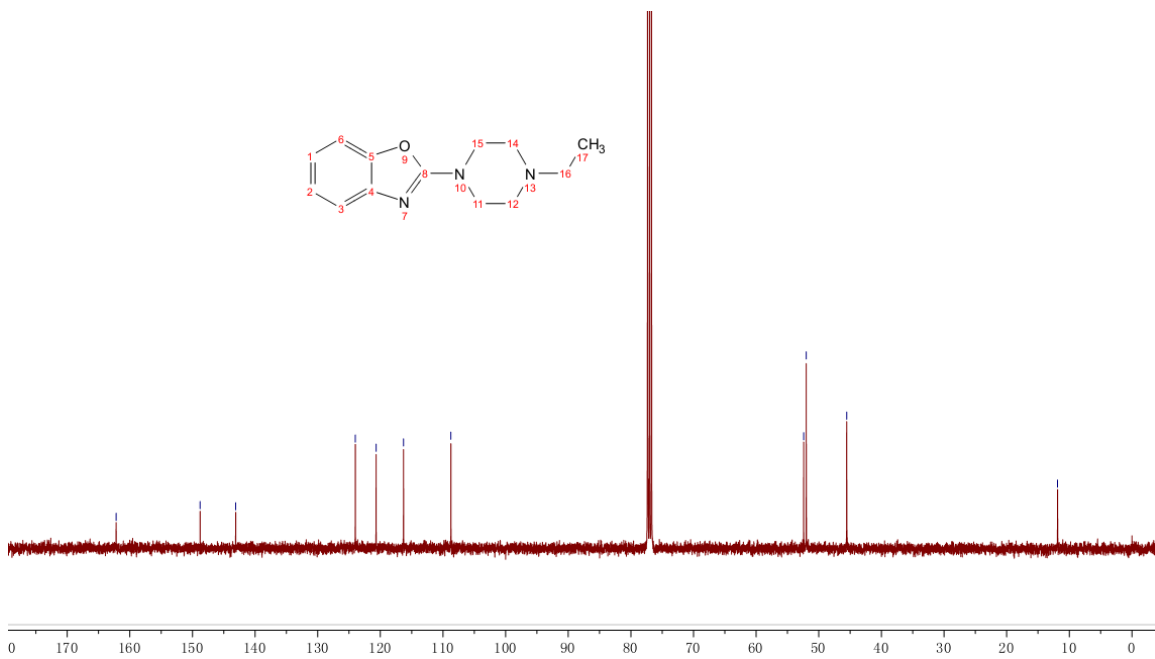

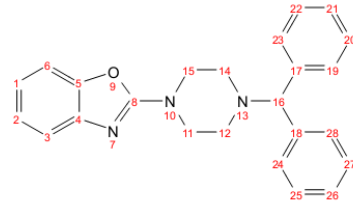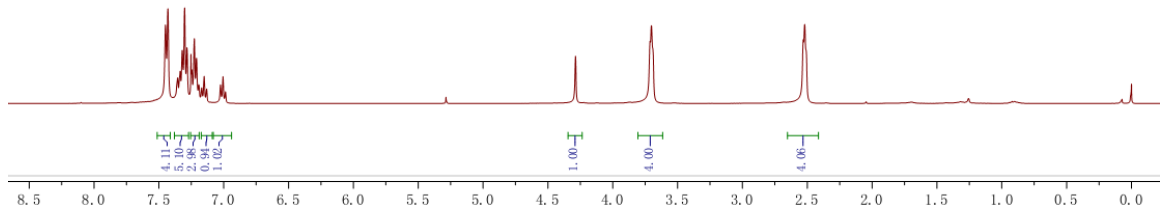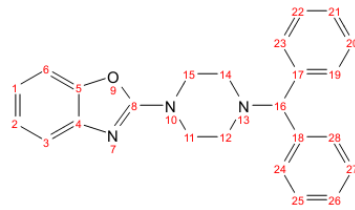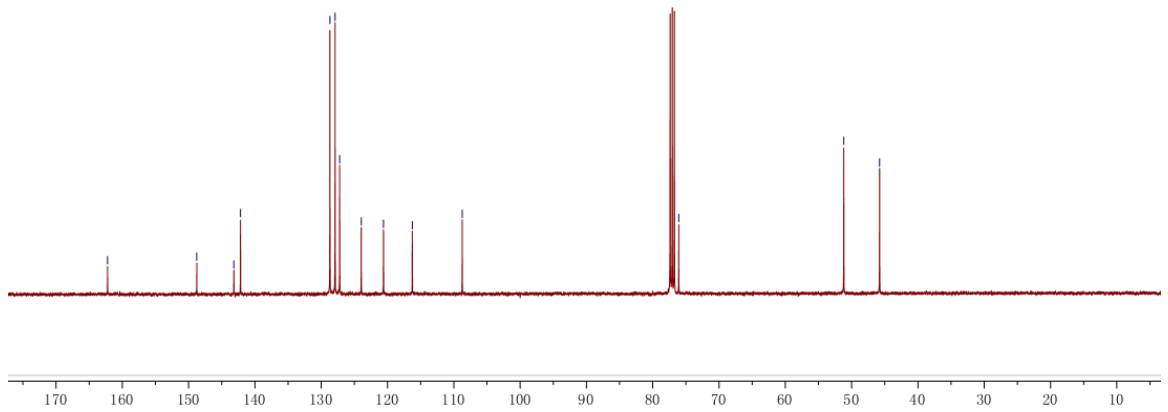

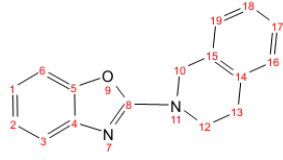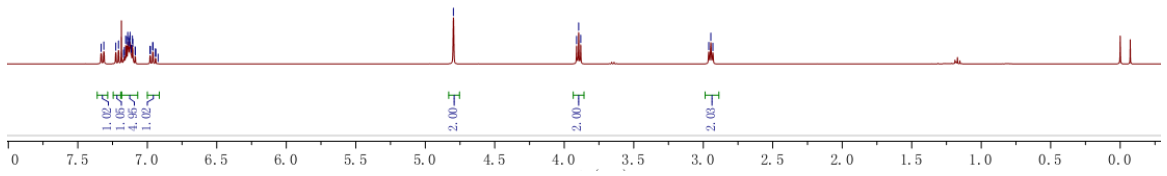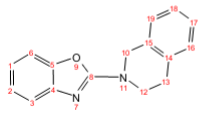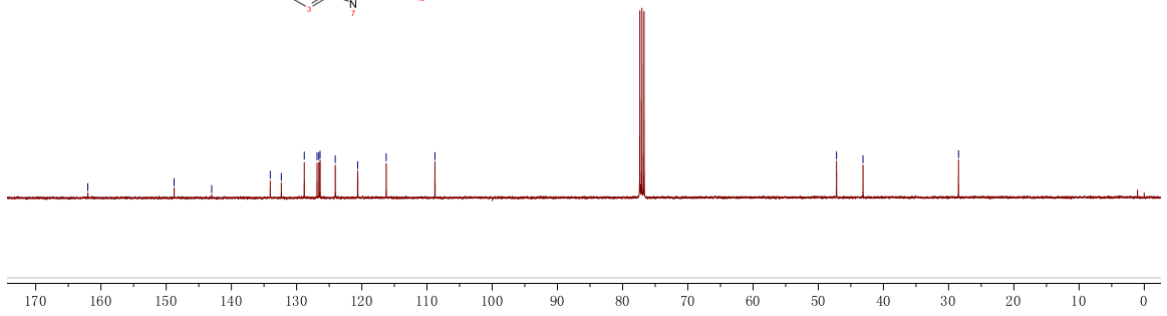

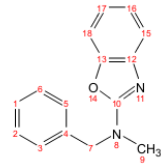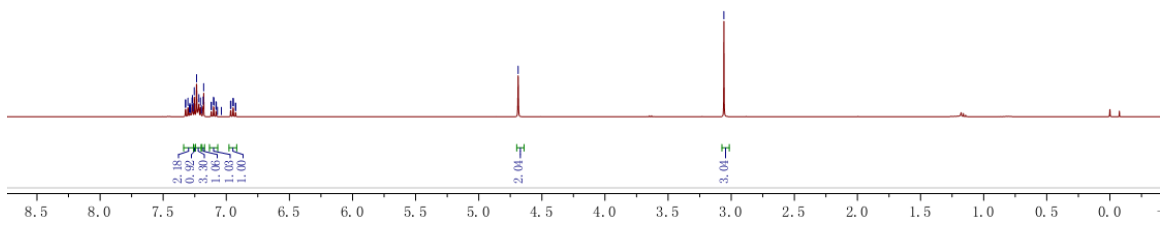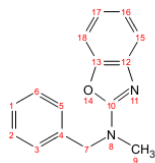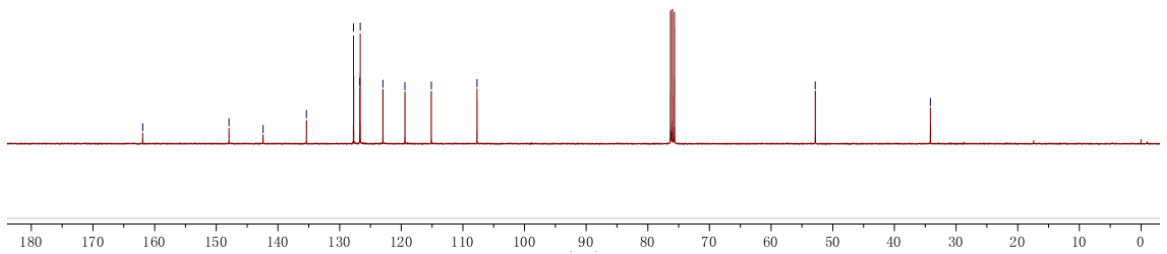

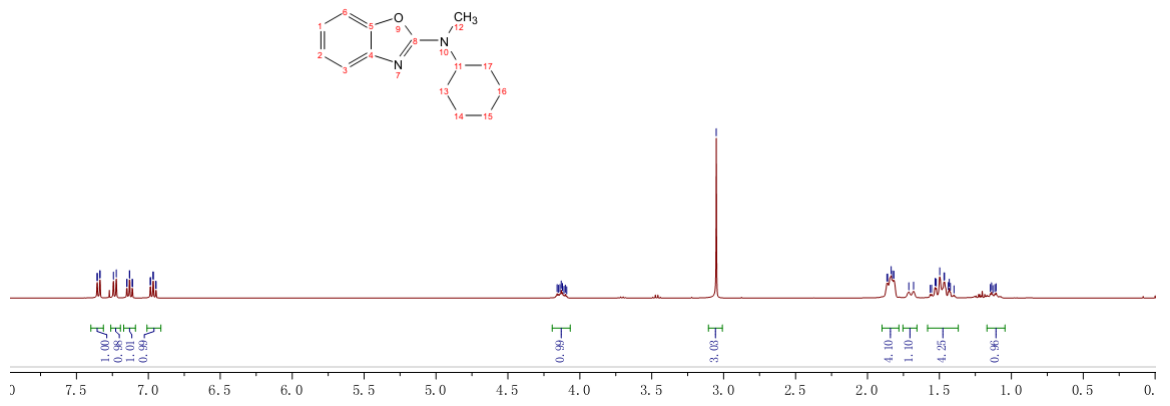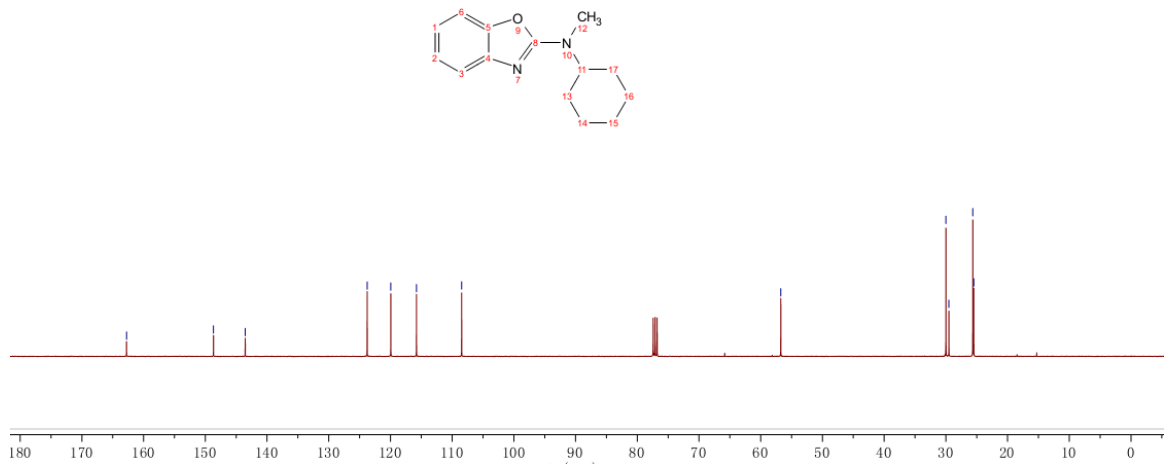





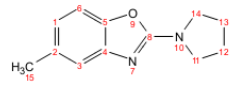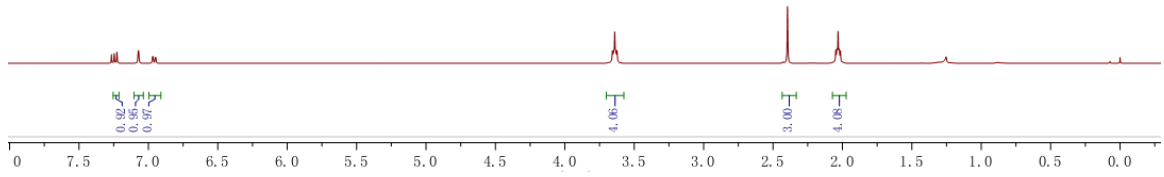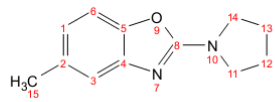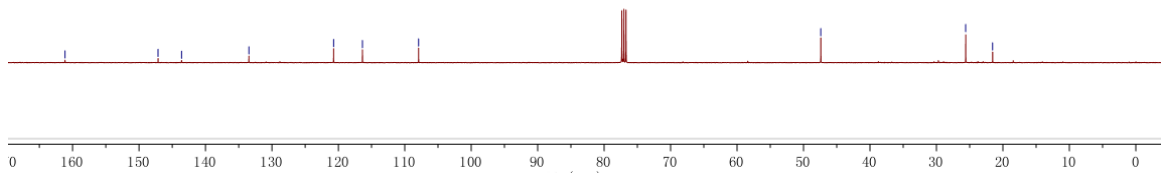



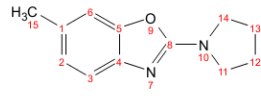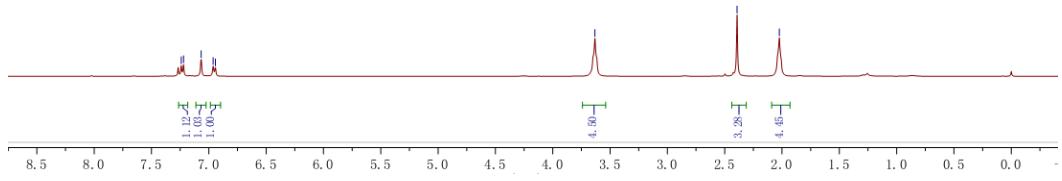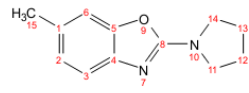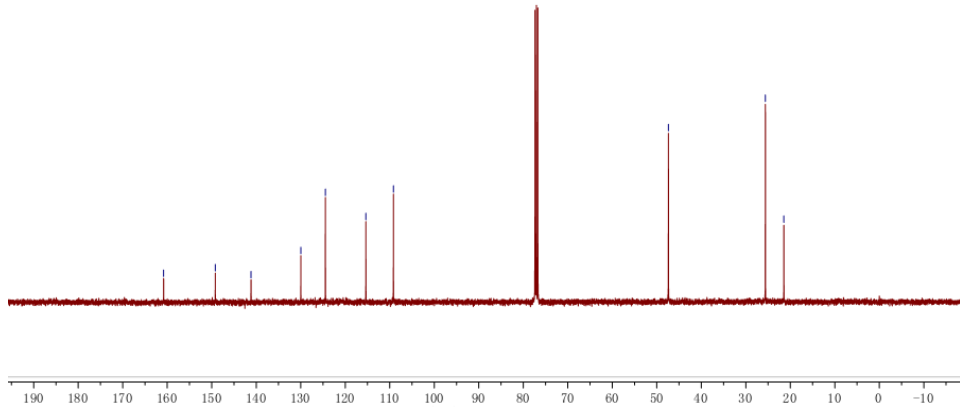

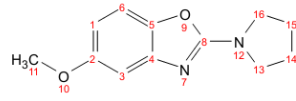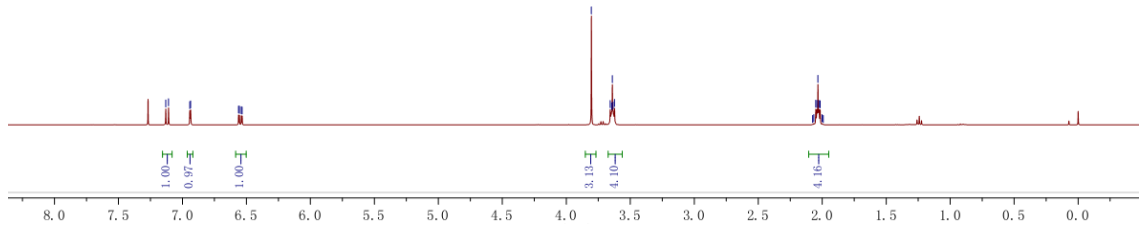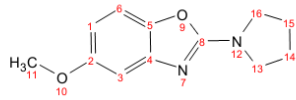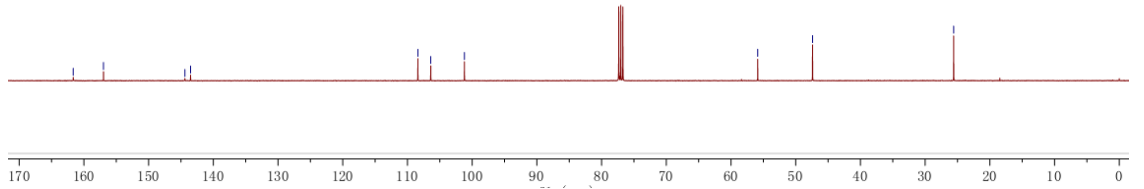

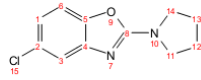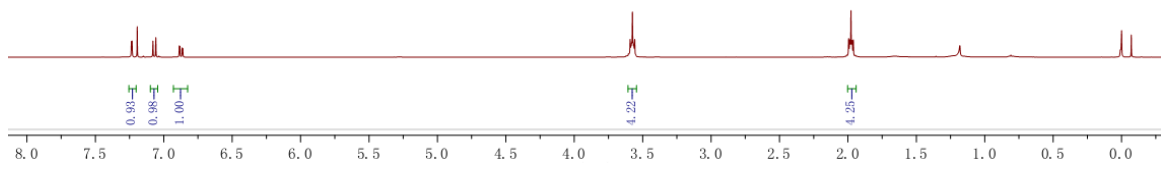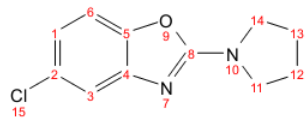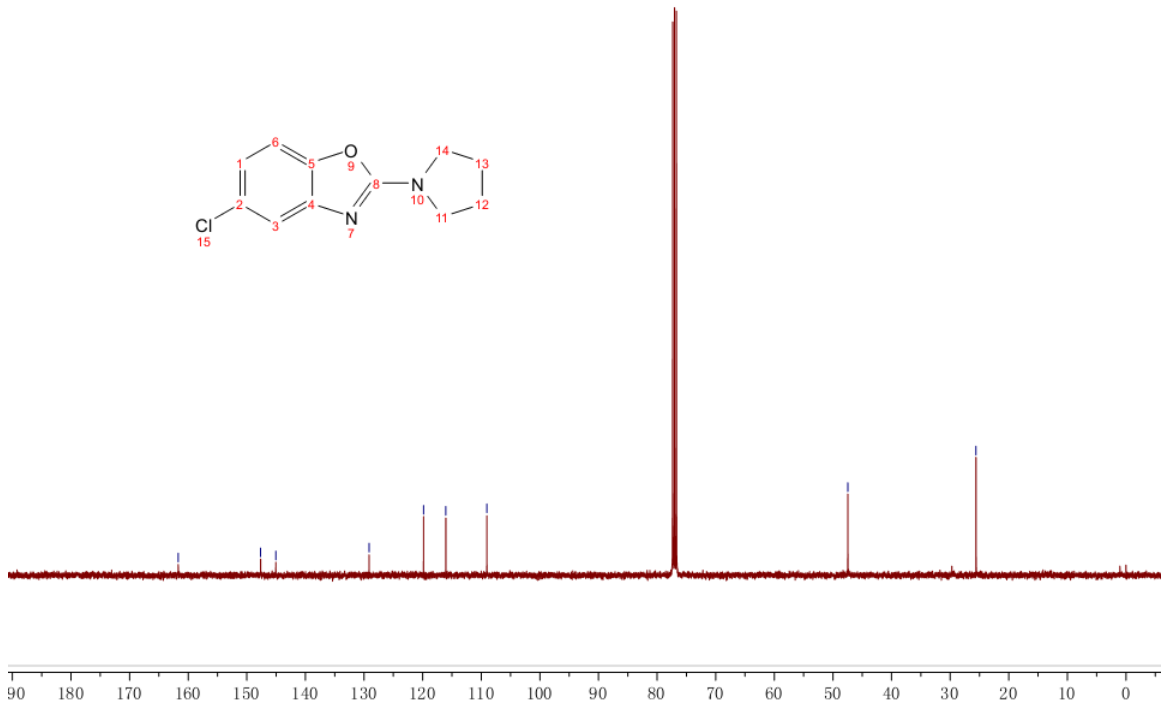

Supplement: c4ob00386a1.pdf [file c4ob00386a1.pdf]
